# Supplementary material
Source: MDPI journal article supplement (https://www.mdpi.com/2673-6918/3/3/32)
Supplement: s1 [file s1]

# Thiazolidine-Based Fluorescent Chiral Ionic Liquids for Trace Copper(II) Ion Sensing

Cassiana H. Griebeler <sup>1</sup>, Mariana F. Bach <sup>2</sup>, Henrique C. Silva, Jr. <sup>1</sup>, Fabiano S. Rodembusch <sup>1,\*</sup>,  
Felipe L. Coelho <sup>3,\*</sup> and Paulo H. Schneider <sup>1,\*</sup>

<sup>1</sup> Instituto de Química, Laboratory of Molecular Catalysis (LAMOCA), Universidade Federal do Rio Grande do Sul (UFRGS), P.O. Box 15003, Porto Alegre 91501-970, RS, Brazil

<sup>2</sup> Instituto Federal Farroupilha, Campus Alegrete, Rodovia RS-377, Alegrete 97555-000, RS, Brazil

<sup>3</sup> Instituto de Química, Universidade Federal de Goiás (UFG), Campus Samambaia, Goiânia 74690-900, GO, Brazil

\* Correspondence: rodembusch@iq.ufrgs.br (F.S.R.); felipecoelho@ufg.br (F.L.C.); paulos@iq.ufrgs.br (P.H.S.)

## Table of Contents

|                                      |    |
|--------------------------------------|----|
| Experimental Procedures.....         | 02 |
| Spectroscopic Characterization.....  | 03 |
| Additional Photophysical Data.....   | 11 |
| Additional Theoretical Data.....     | 15 |
| Additional Optical Sensing Data..... | 17 |

## Experimental Procedures

*Synthesis of precursor 2:* A round-bottomed flask was charged with L-cysteine chlorhydrate (16 g, 95 mmol), distilled water (10 mL), and formaldehyde 37% (11 mL). The mixture was stirred for 24 h at room temperature. Then, ethyl alcohol (25 mL) and pyridine were added. The precipitate was filtered and washed with ethyl alcohol (5 x 20 mL). The product was obtained as a white solid powder with no additional purification needed. Yield: 80 %. Melting point: 180°C (decomposition). <sup>1</sup>H NMR (400 MHz, CDCl<sub>3</sub>) δ: 4.19 (d, *J* = 8.9 Hz, 1H); 4.00 (d, *J* = 8.9 Hz, 1H); 3.81 (t, *J* = 6.8 Hz, 1H); 3.05 (dd, *J* = 7.1 Hz and 10.1, 1H); 2.79 (dd, *J* = 6.6 Hz and 10.1 Hz, 1H).

*Synthesis of precursor 3:* A round-bottomed flask was charged with compound **2** (10.8 g, 81 mmol), 1,4-dioxane (162 mL), distilled water (81 mL), and NaOH aqueous solution (1.0 mol·L<sup>-1</sup>, 81 mL). The system was cooled to 0°C and Boc<sub>2</sub>O (19.42 g, 89 mmol) was added. The mixture was then kept at room temperature and stirred for 12 h. The mixture was concentrated under a vacuum, cooled to 0°C, and AcOEt (80 mL) was added. The acidification was carried out until pH 2-3 through the addition of KHSO<sub>4</sub> 1.0 mol·L<sup>-1</sup> aqueous solution drops. The aqueous layer was extracted with ethyl acetate (3 x 60 mL). The organic layer was combined, washed with distilled water, dried with MgSO<sub>4</sub>, and the solvent was evaporated. The product was obtained as a white solid powder. Yield: 90 %. <sup>1</sup>H NMR (400 MHz, CDCl<sub>3</sub>, mixture of conformers) δ: 7.86-7.40 (m, 1H); 4.94-4.68 (m, 1H); 4.68-4.54 (m, 1H); 4.53-4.33 (m, 1H); 3.46-3.22 (2H); 1.49 (s, 9H).

## Spectroscopic Characterization

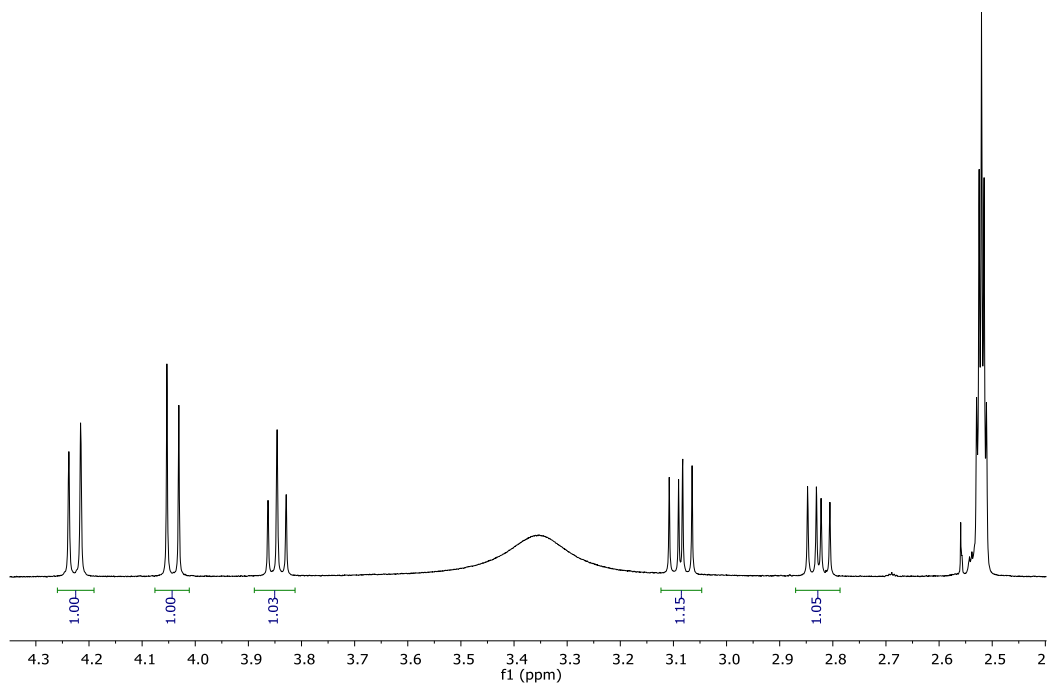

**Figure S1.** <sup>1</sup>H NMR spectrum (DMSO-*d*<sub>6</sub>, 400 MHz) of compound 2.

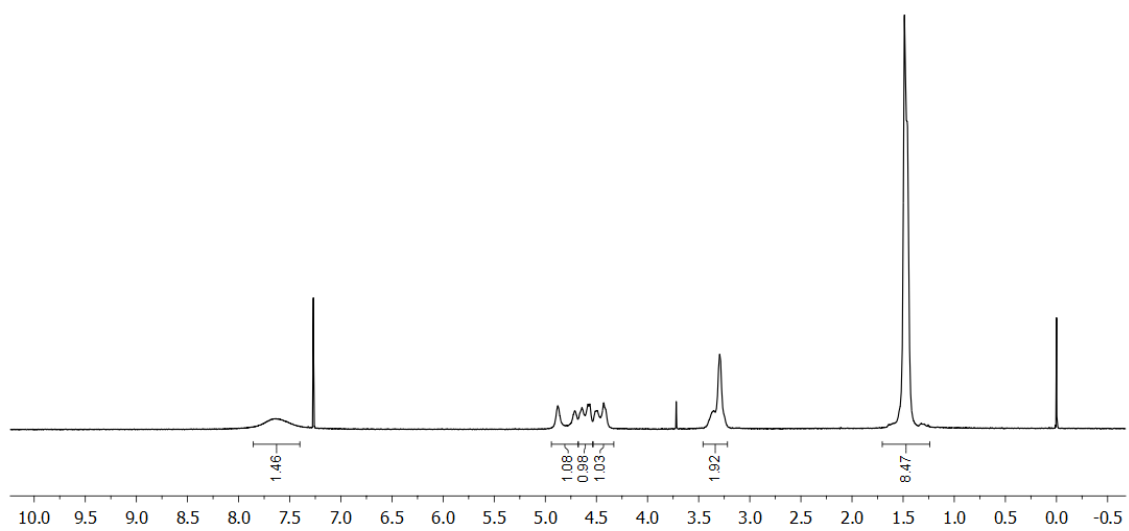

**Figure S2.** <sup>1</sup>H NMR spectrum (CDCl<sub>3</sub>, 400 MHz) of compound 3.

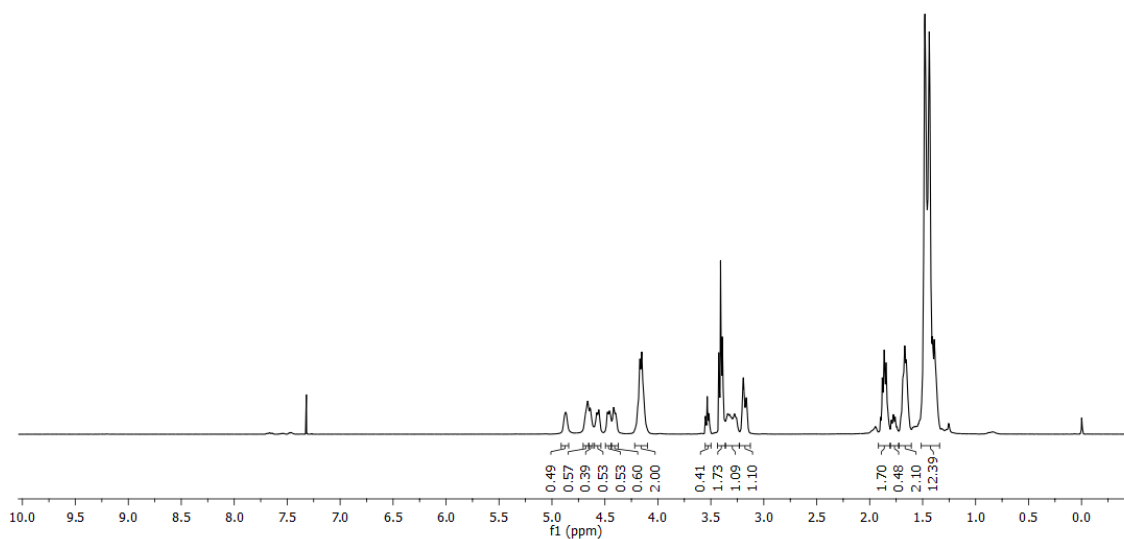

**Figure S3.**  $^1\text{H}$  NMR spectrum ( $\text{CDCl}_3$ , 400 MHz) of compound **4**.

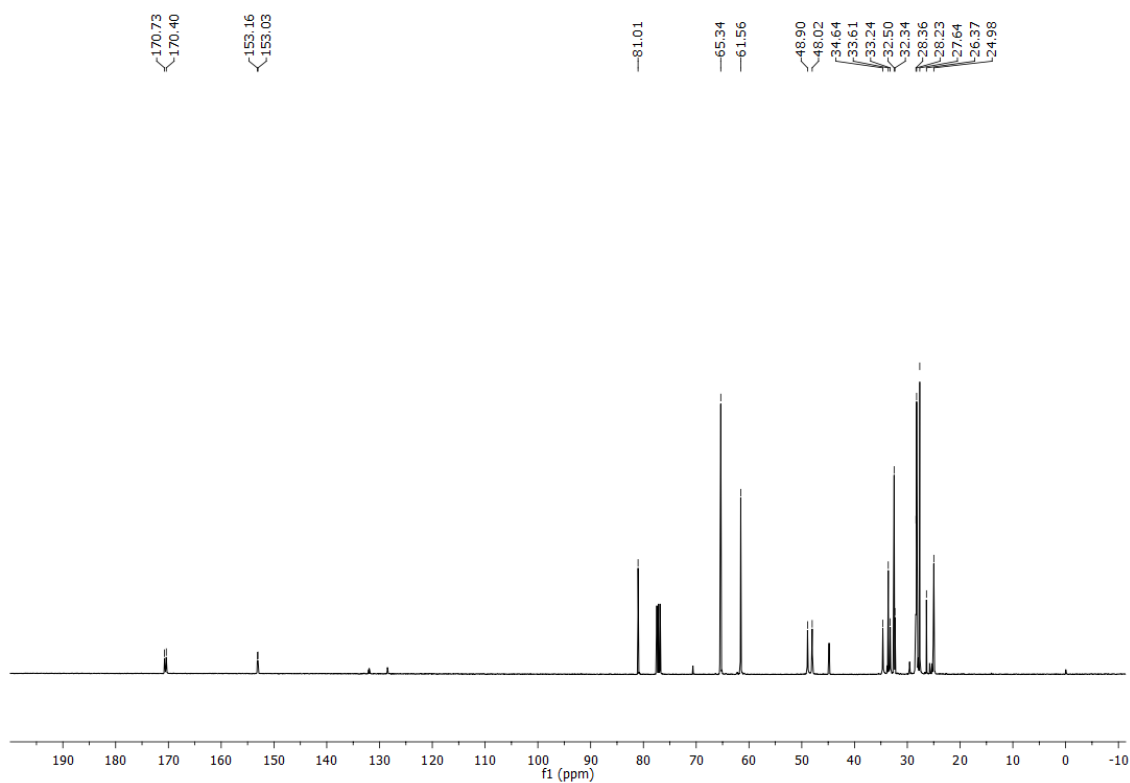

**Figure S4.**  $^{13}\text{C}$  NMR spectrum ( $\text{CDCl}_3$ , 100 MHz) of compound **4**.

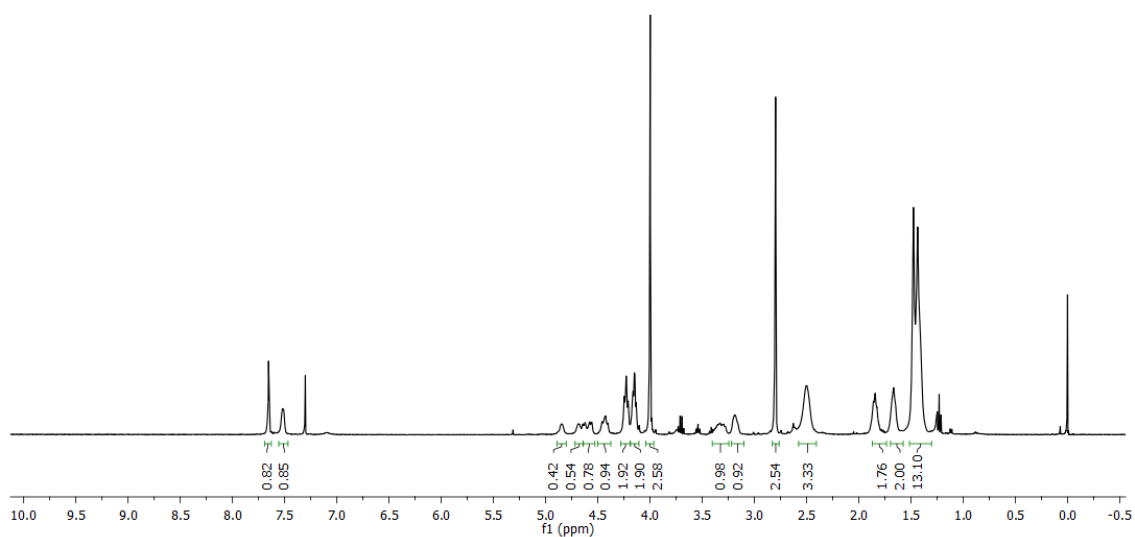

**Figure S5.**  $^1\text{H}$  NMR spectrum ( $\text{CDCl}_3$ , 400 MHz) of compound **5a**.

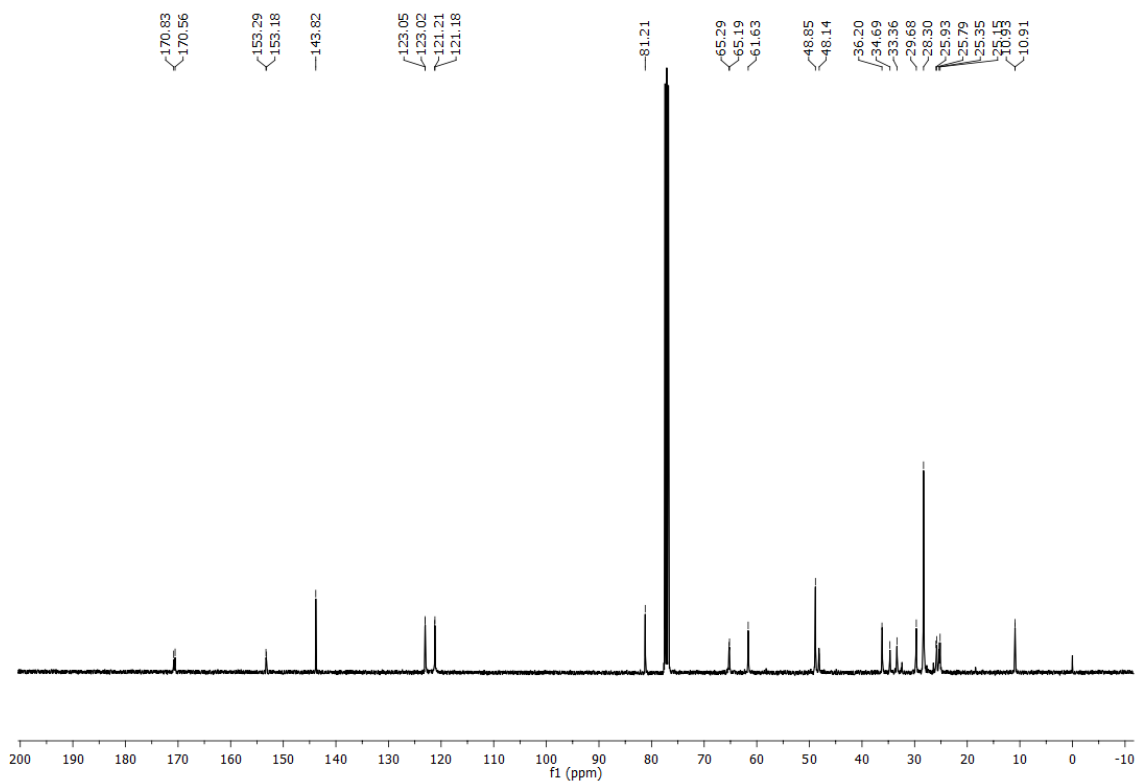

**Figure S6.**  $^{13}\text{C}$  NMR spectrum ( $\text{CDCl}_3$ , 100 MHz) of compound **5a**.

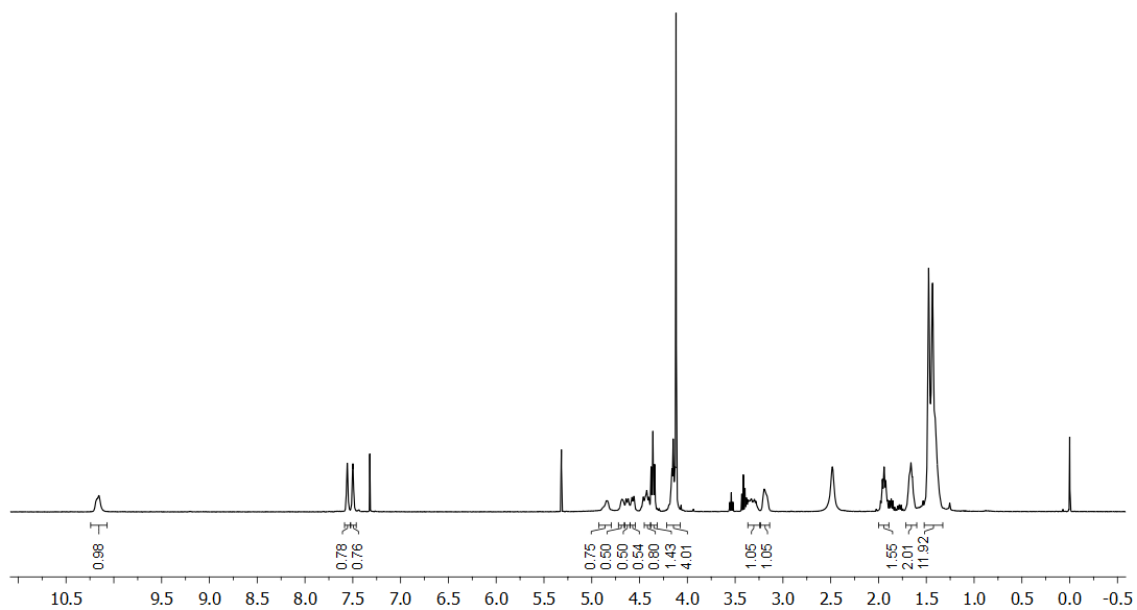

**Figure S7.**  $^1\text{H}$  NMR spectrum ( $\text{CDCl}_3$ , 400 MHz) of compound **5b**.

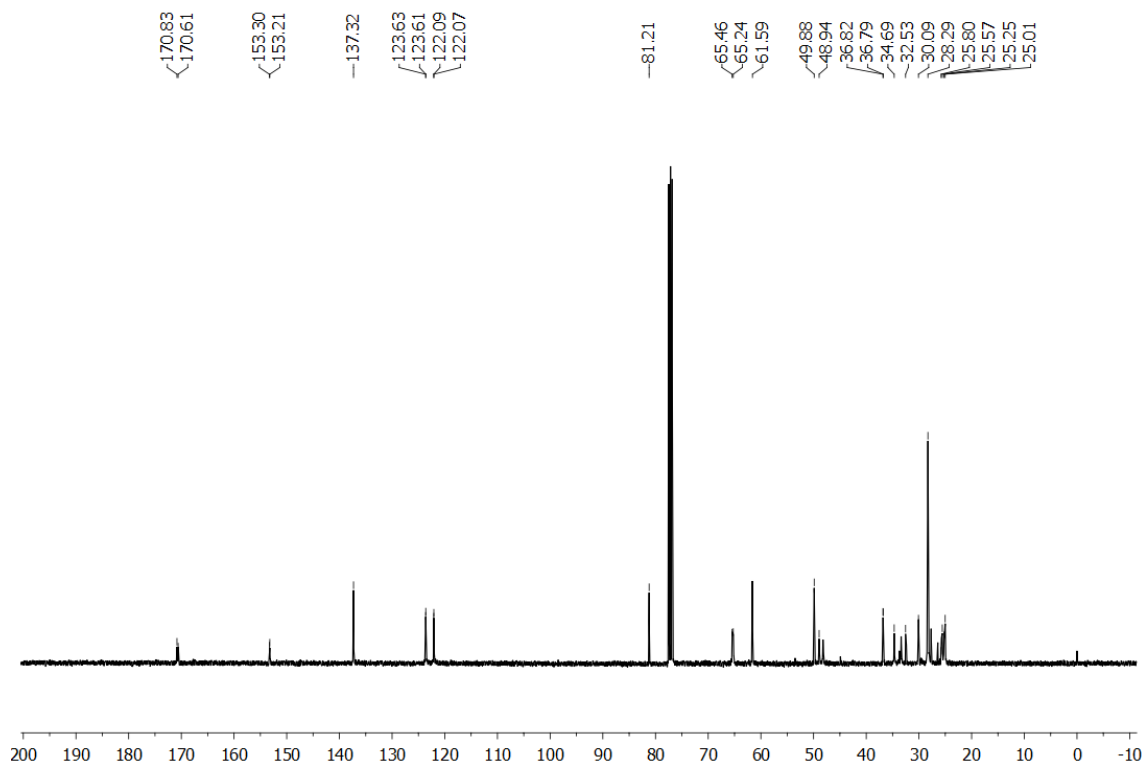

**Figure S8.**  $^{13}\text{C}$  NMR spectrum ( $\text{CDCl}_3$ , 100 MHz) of compound **5b**.

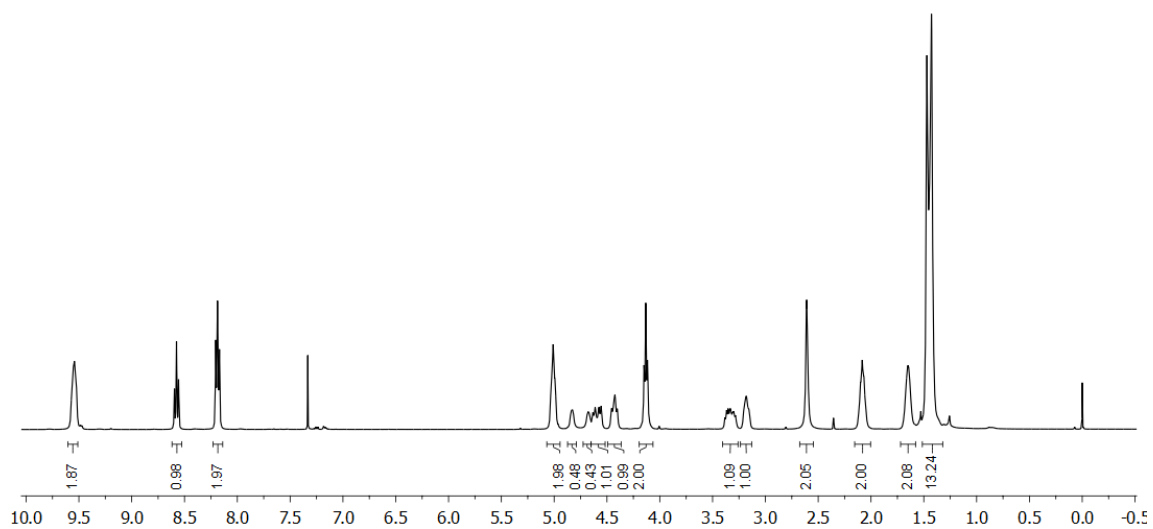

**Figure S9.**  $^1\text{H}$  NMR spectrum ( $\text{CDCl}_3$ , 400 MHz) of compound **5c**.

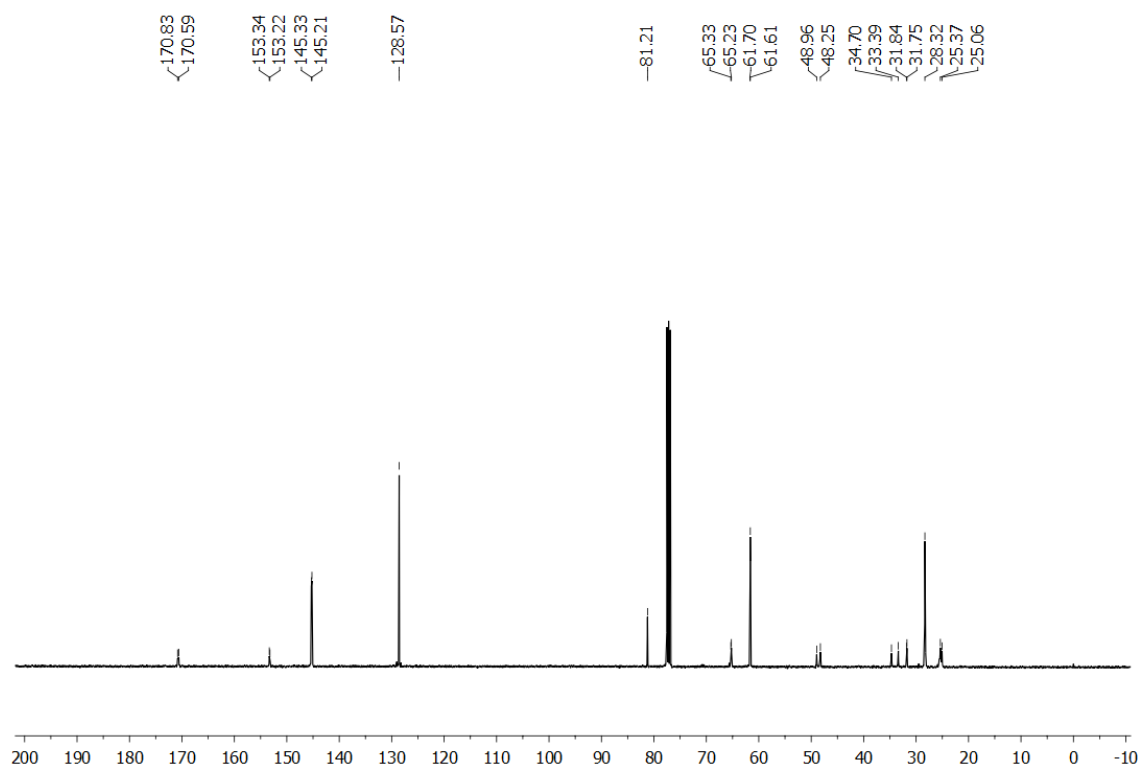

**Figure S10.**  $^{13}\text{C}$  NMR spectrum ( $\text{CDCl}_3$ , 100 MHz) of compound **5c**.

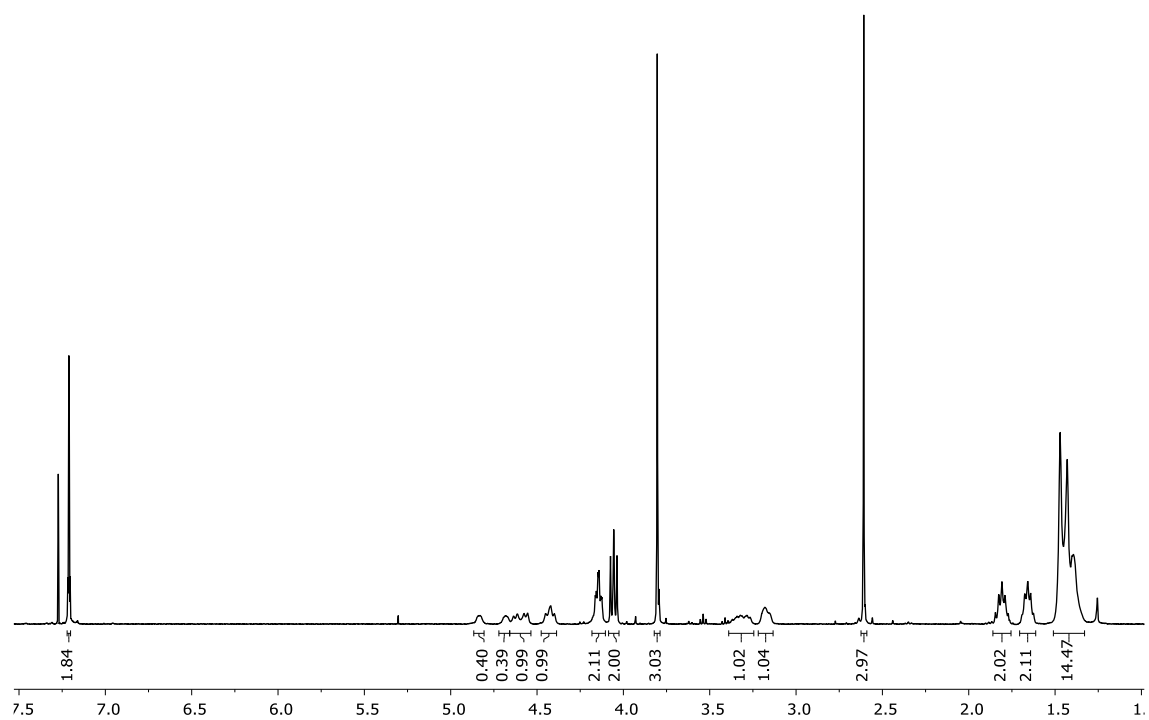

**Figure S11.**  $^1\text{H}$  NMR spectrum ( $\text{CDCl}_3$ , 400 MHz) of compound **6a**.

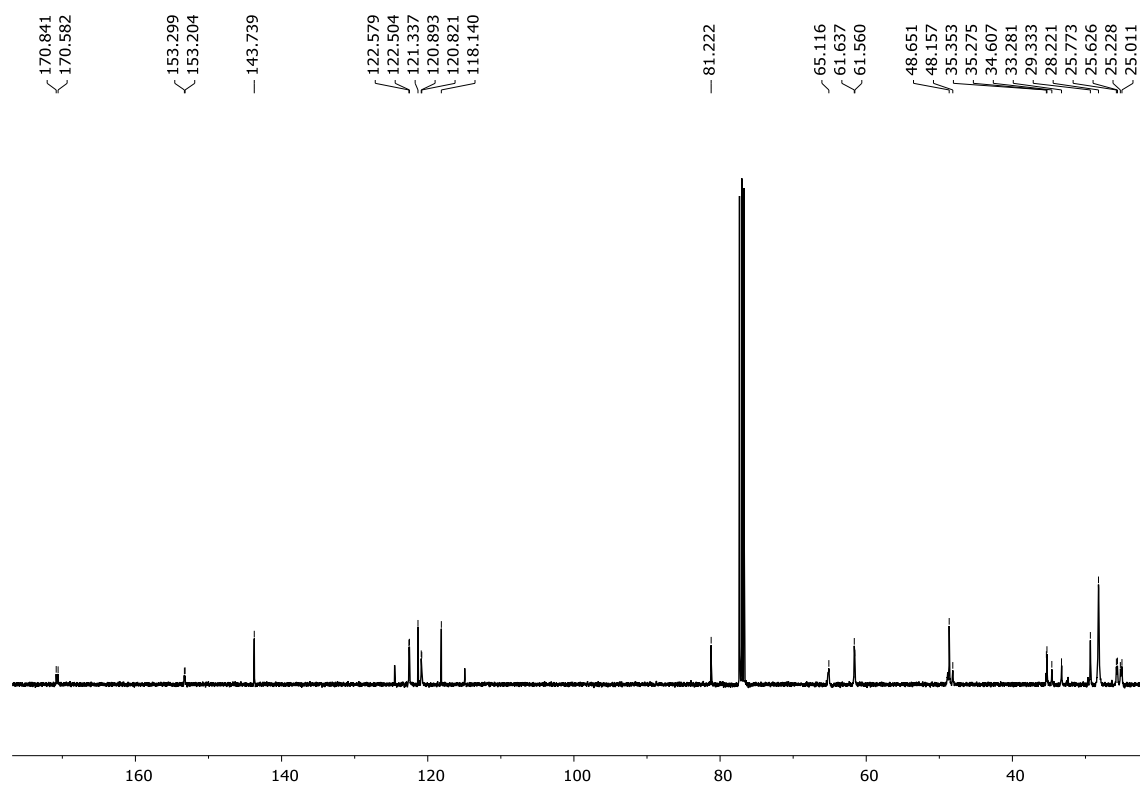

**Figure S12.**  $^{13}\text{C}$  NMR spectrum ( $\text{CDCl}_3$ , 100 MHz) of compound **6a**.

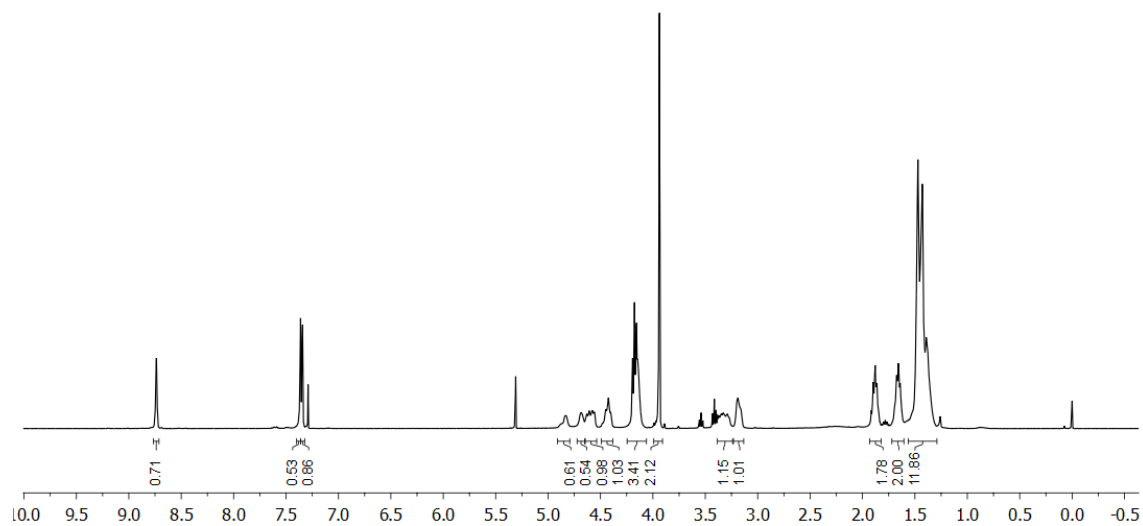

**Figure S13.** <sup>1</sup>H NMR spectrum (CDCl<sub>3</sub>, 400 MHz) of compound **6b**.

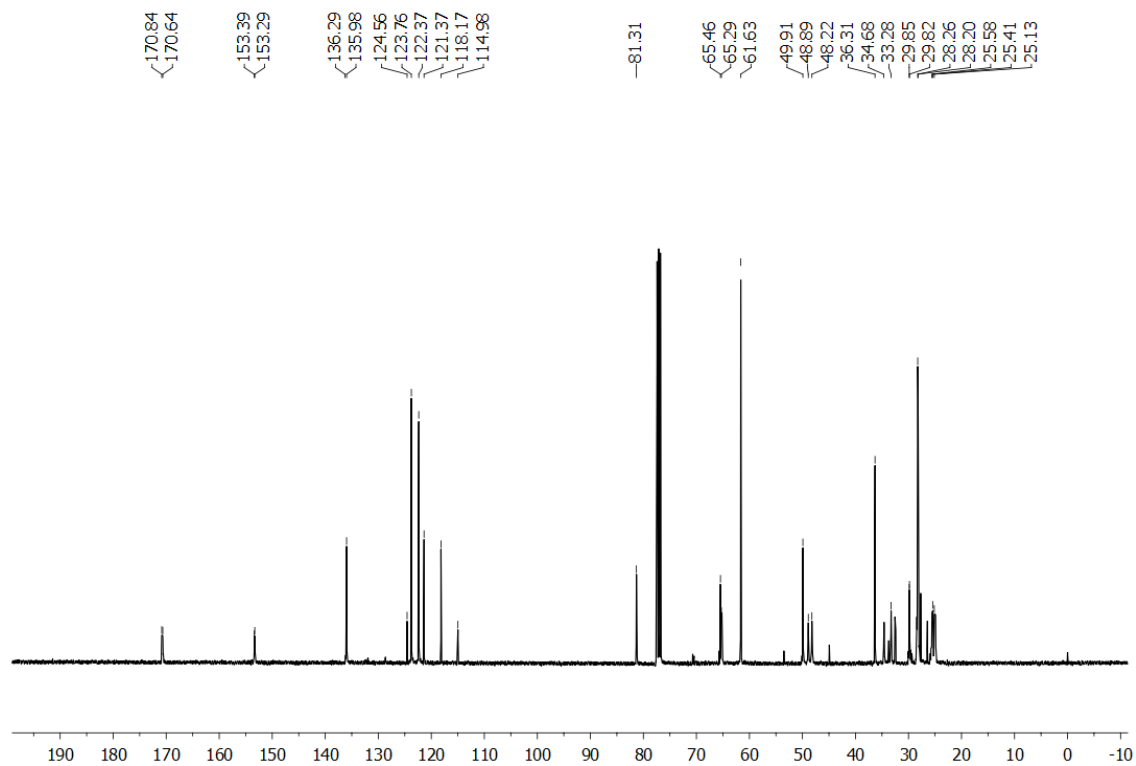

**Figure S14.** <sup>13</sup>C NMR spectrum (CDCl<sub>3</sub>, 100 MHz) of compound **6b**.

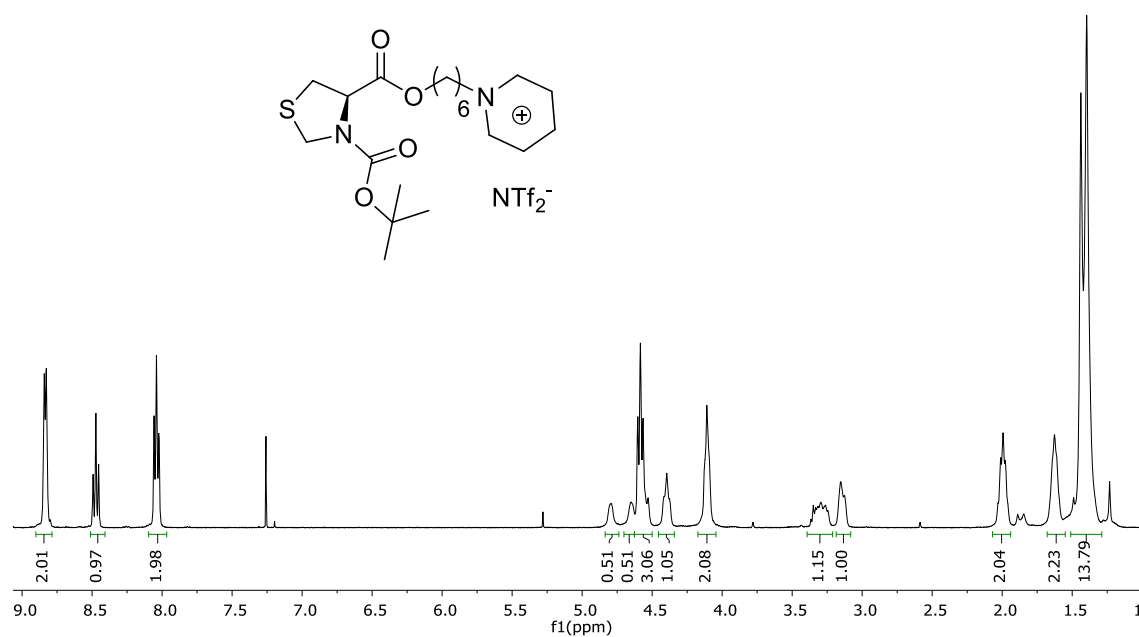

**Figure S15.** <sup>1</sup>H NMR spectrum (CDCl<sub>3</sub>, 400 MHz) of compound 6c.

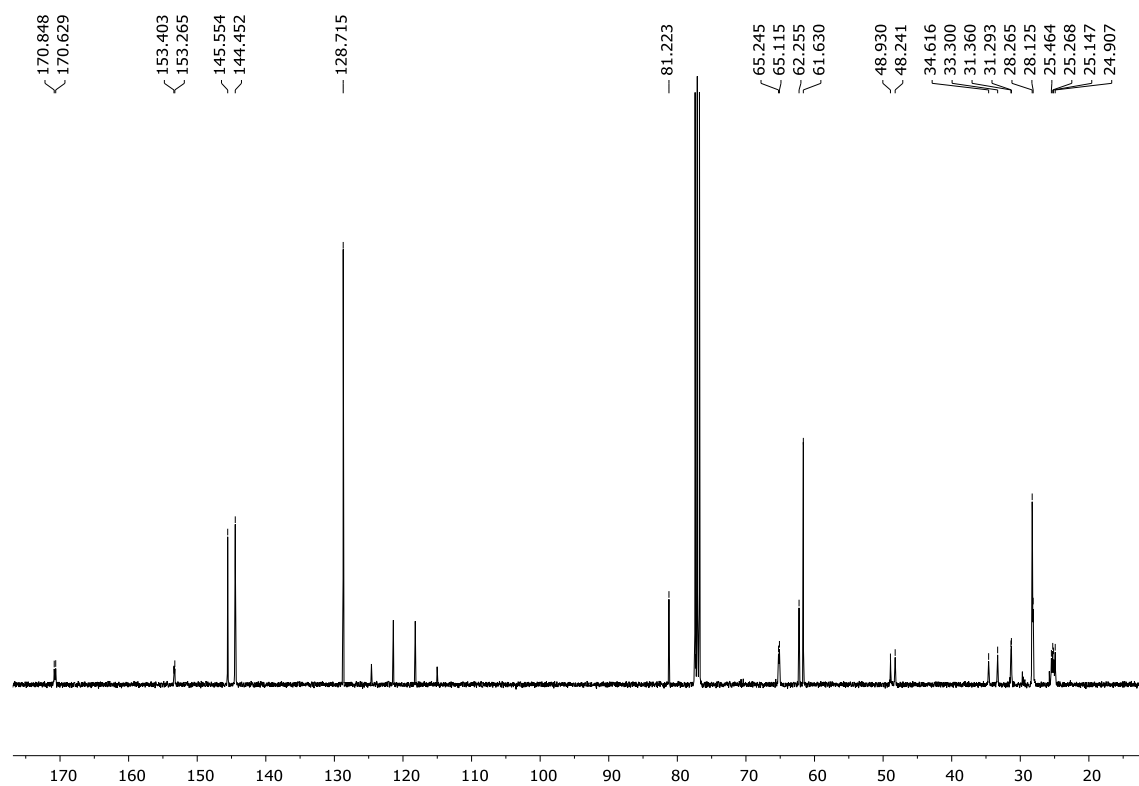

**Figure S16.** <sup>13</sup>C NMR spectrum (CDCl<sub>3</sub>, 100 MHz) of compound 6c.

### Additional Photophysical Data

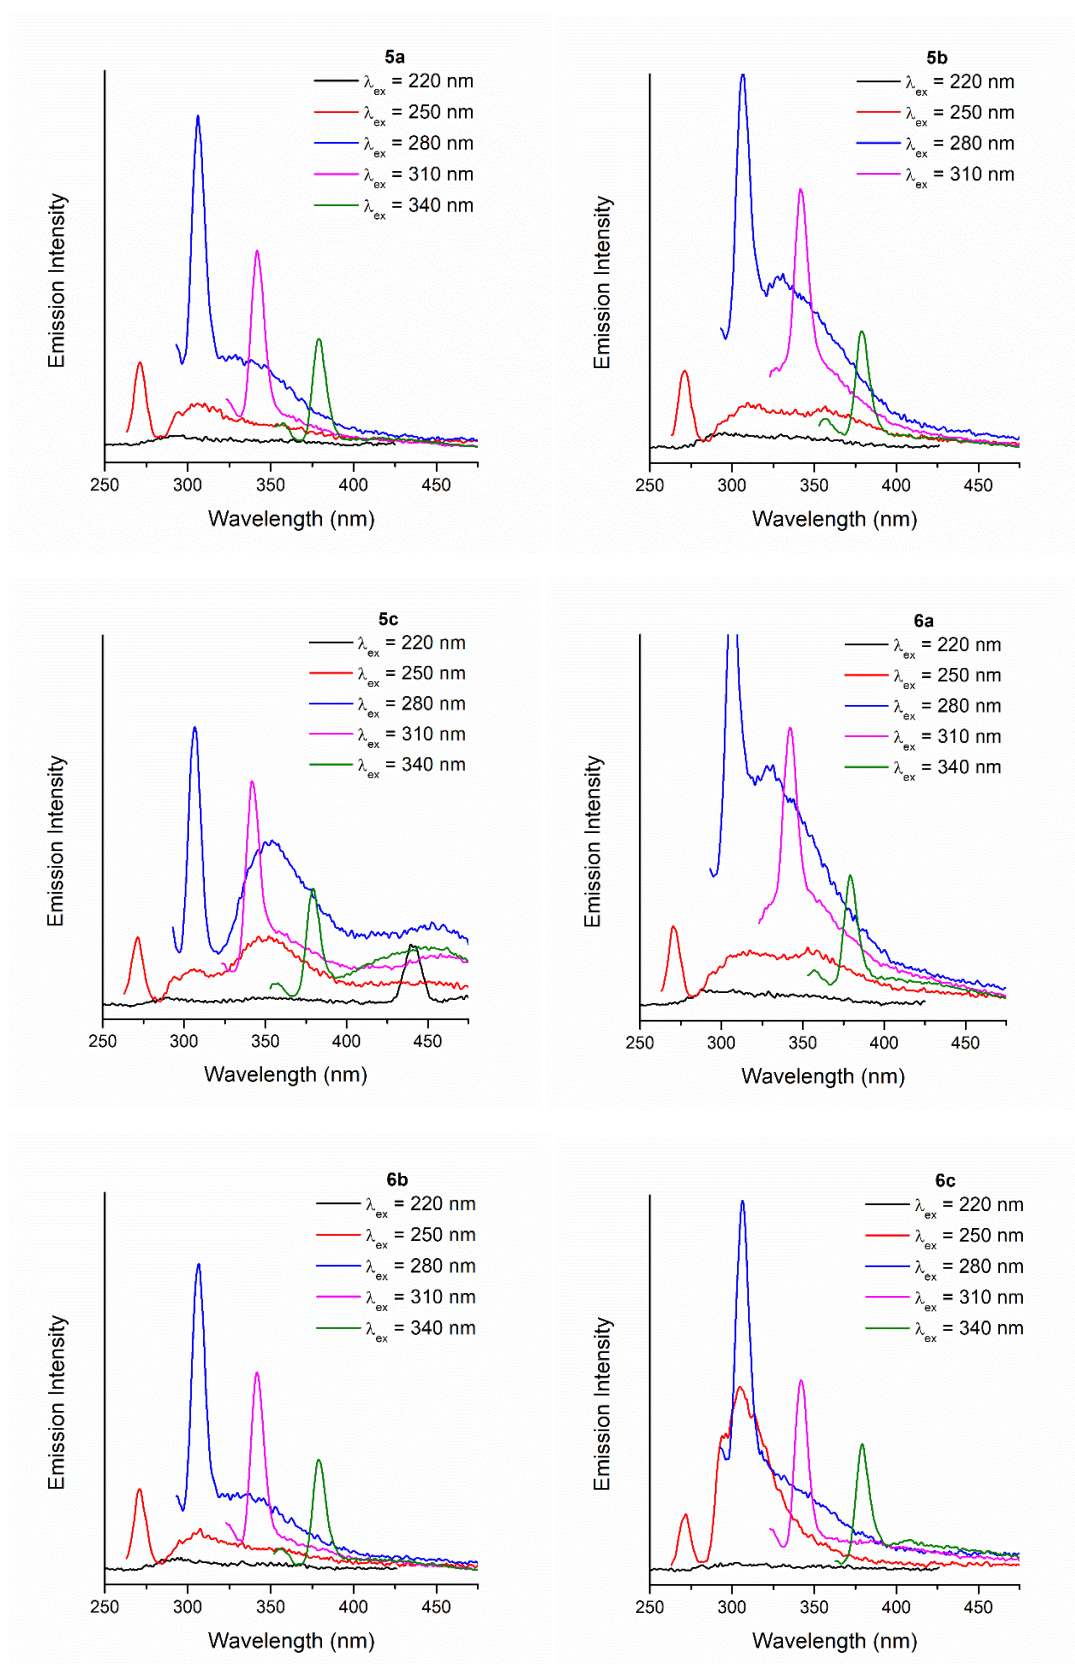

**Figure S17.** Fluorescence emission spectra of compounds **5a-c** and **6a-c** in ethanol using different excitation wavelengths.

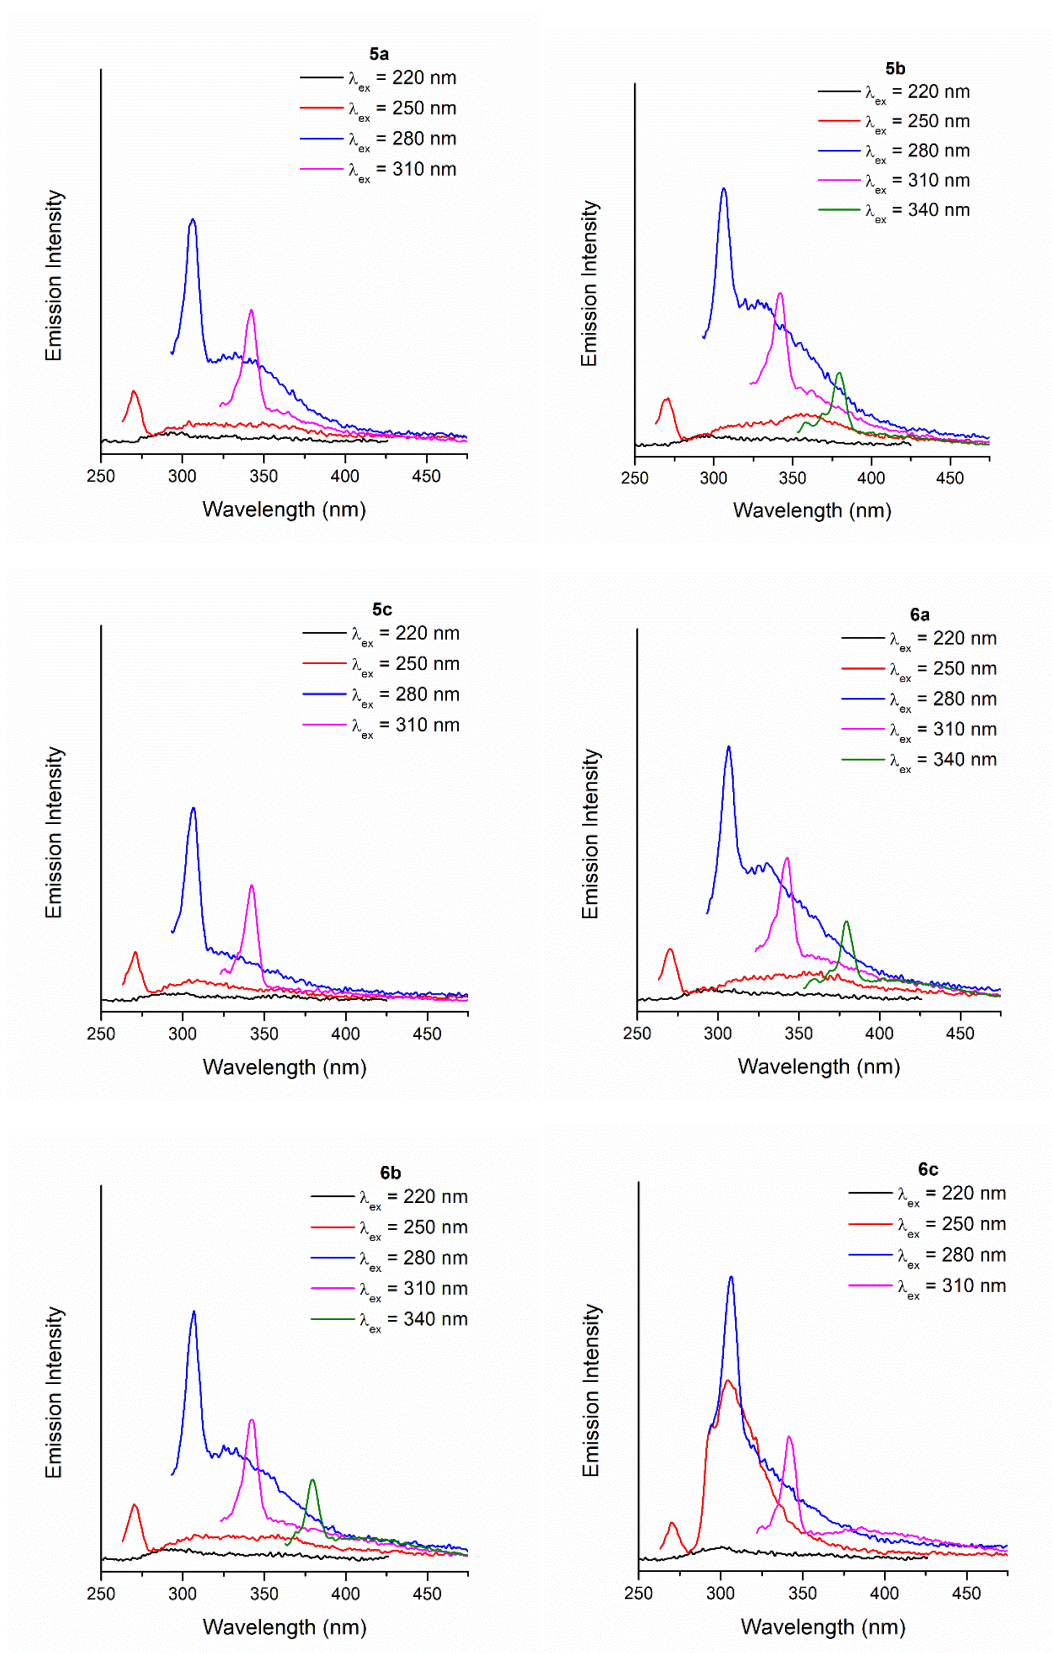

**Figure S18.** Fluorescence emission spectra of compounds **5a-c** and **6a-c** in acetonitrile using different excitation wavelengths.

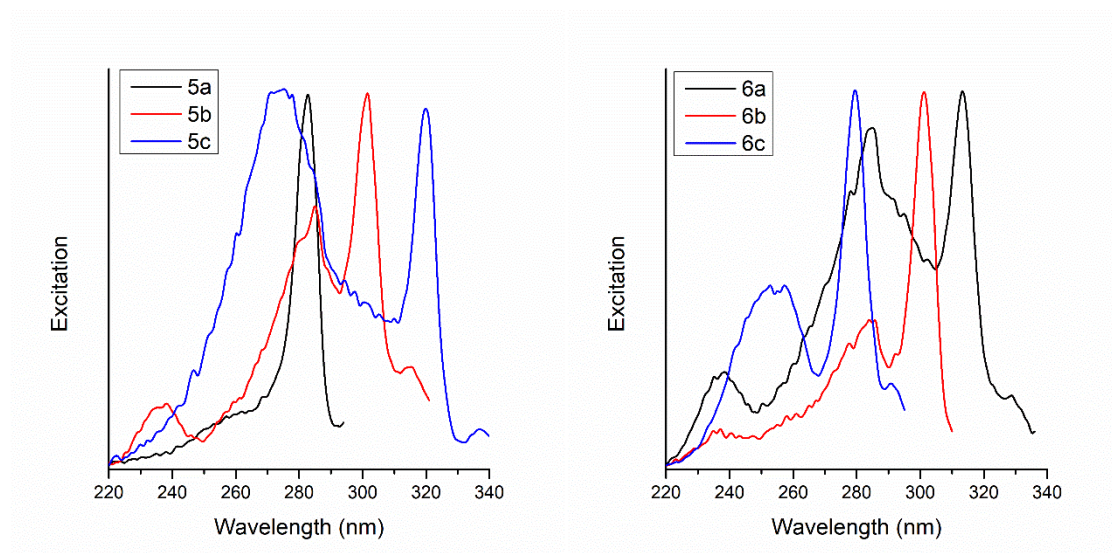

**Figure S19.** Excitation spectra of **5a-c** (left) and **6a-c** (right) in ethanol.

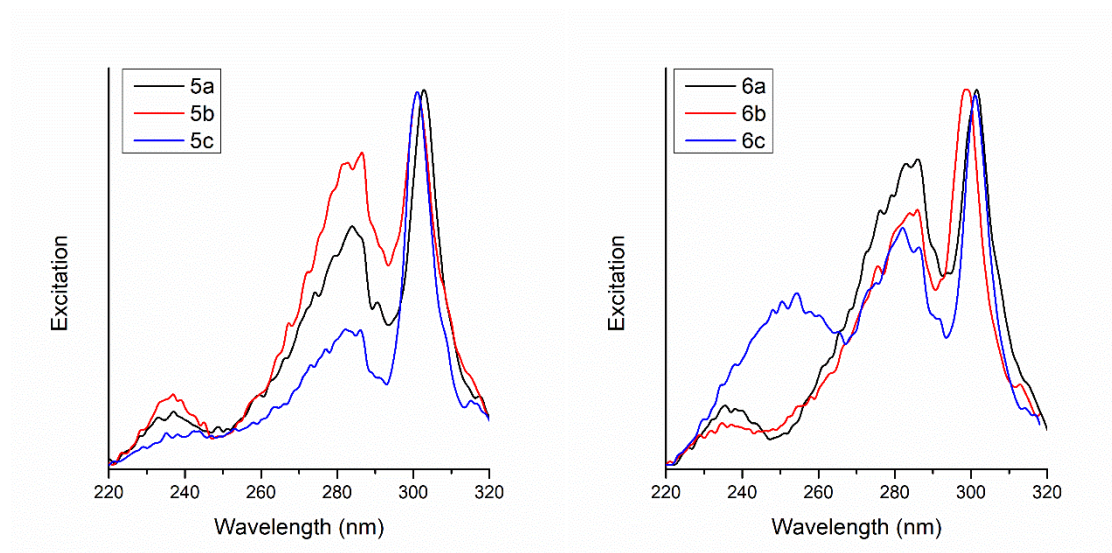

**Figure S20.** Excitation spectra of **5a-c** (left) and **6a-c** (right) in acetonitrile.

## Additional Theoretical Data

**Table S1.** SAPT2 energy decomposition for a two-body system molecule-bromine.

| Measurement    | 6a (kcal·mol <sup>-1</sup> ) | 6b (kcal·mol <sup>-1</sup> ) | 6c (kcal·mol <sup>-1</sup> ) |
|----------------|------------------------------|------------------------------|------------------------------|
| Electrostatics | -102.32                      | -97.12                       | -94.45                       |
| Exchange       | 42.17                        | 39.92                        | 41.02                        |
| Induction      | -19.96                       | -20.10                       | -20.43                       |
| Dispersion     | -19.60                       | -17.16                       | -15.39                       |

**Table S2.** Dipole moments comparison for the fully optimized S<sub>0</sub> and S<sub>1</sub> geometries.

|                |                                                                                     |                                                                                     |                                                                                       |
|----------------|-------------------------------------------------------------------------------------|-------------------------------------------------------------------------------------|---------------------------------------------------------------------------------------|
| S <sub>1</sub> | 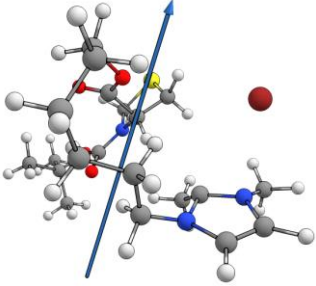  |   |   |
|                | 3.972 Debye                                                                         | 3.729 Debye                                                                         | 4.276 Debye                                                                           |
| S <sub>0</sub> |  |  |  |
|                | 9.743 Debye                                                                         | 9.269 Debye                                                                         | 9.660 Debye                                                                           |

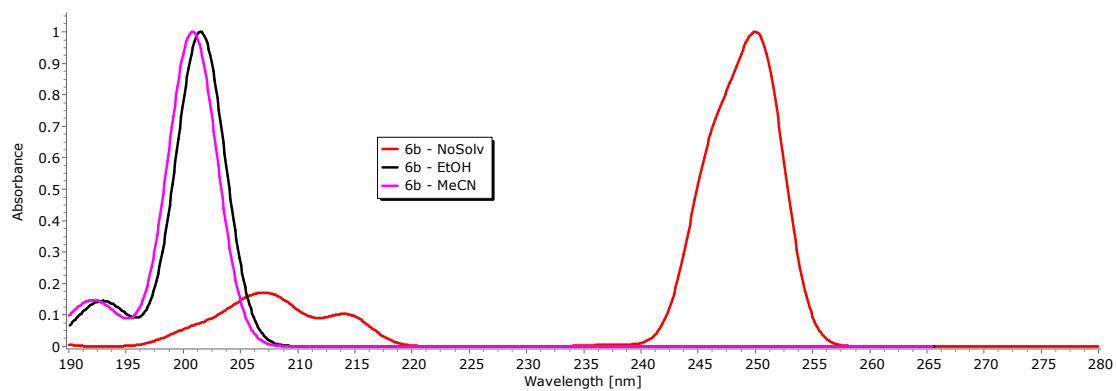

**Figure S21.** Comparison of the  $\omega$ B97X-D3/Def2-TZVP absorption spectra for molecule **3b** using no solvation model (red) and CPCM for ethanol (black) and acetonitrile (pink).

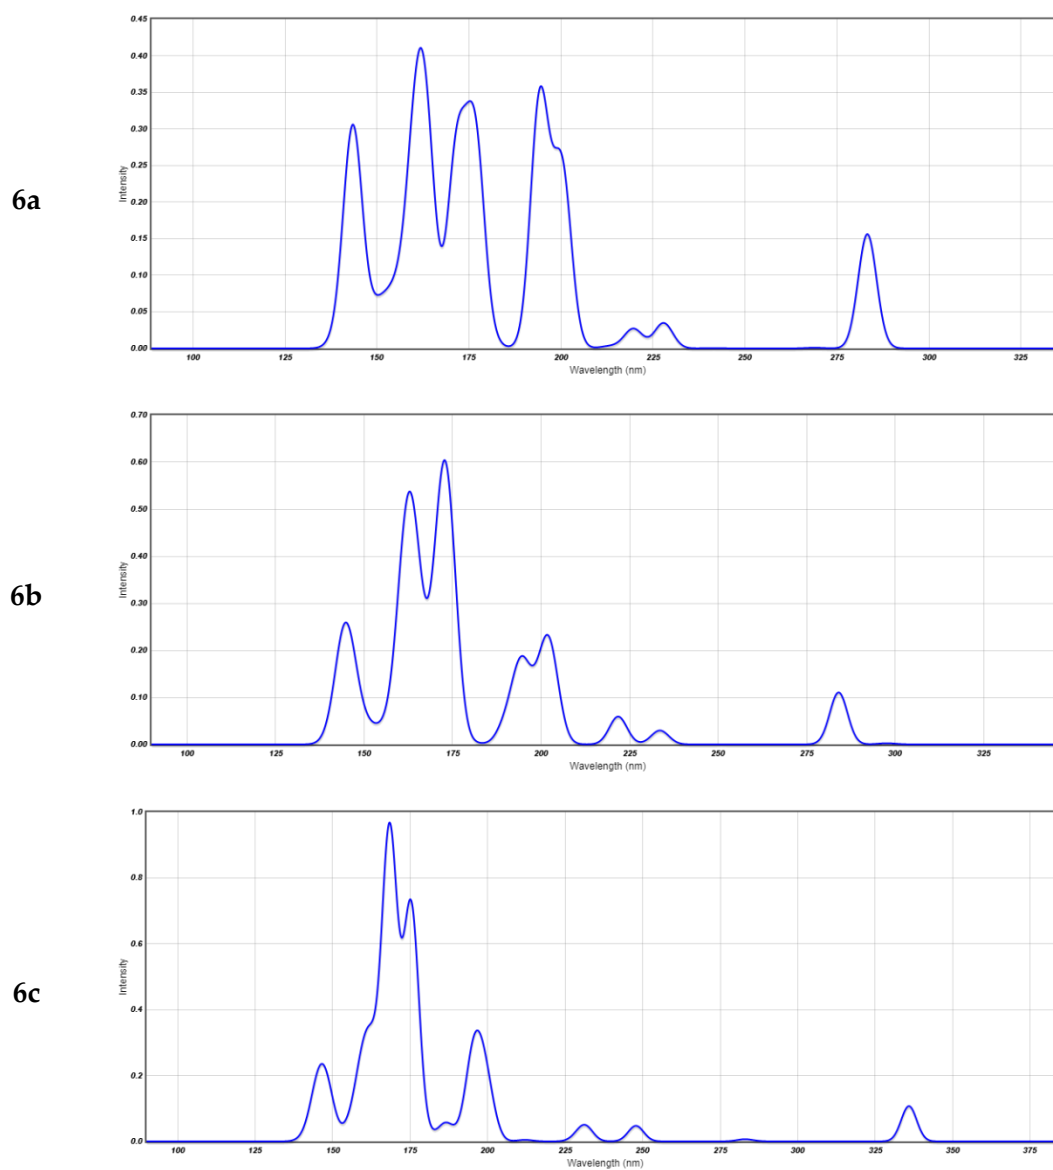

**Figure S22.** Absorption spectra calculated using CAS(30,15) on the MOPAC software with COSMO solvation to simulate ethanol.

### Additional Optical sensing Data

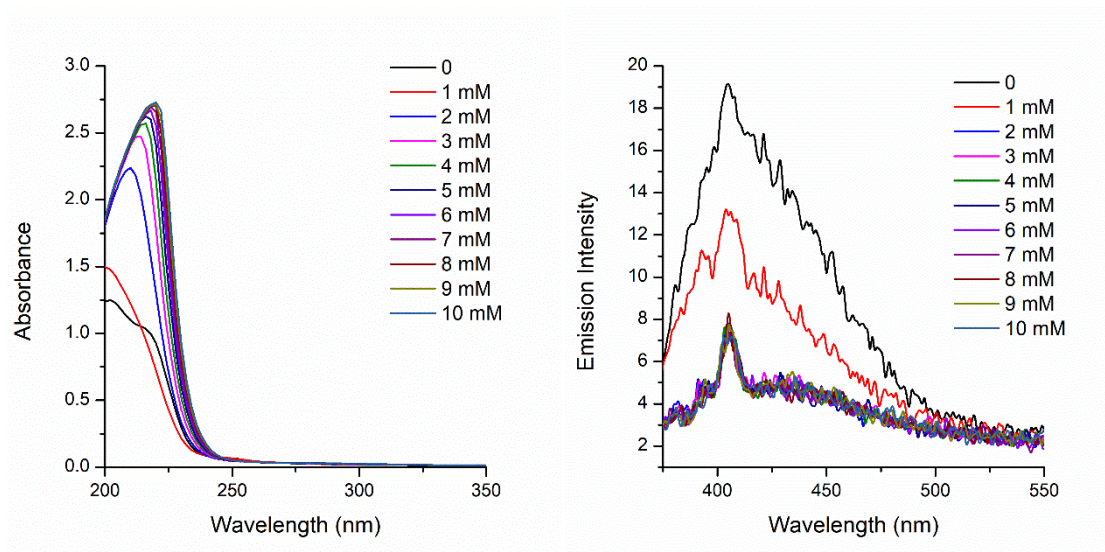

**Figure S23.** UV-Vis absorption (left) and fluorescence emission (right) spectra of **5a** at different amounts of  $\text{Zn}^{2+}$  in a  $\text{CH}_3\text{CN}/\text{H}_2\text{O}$  solution.

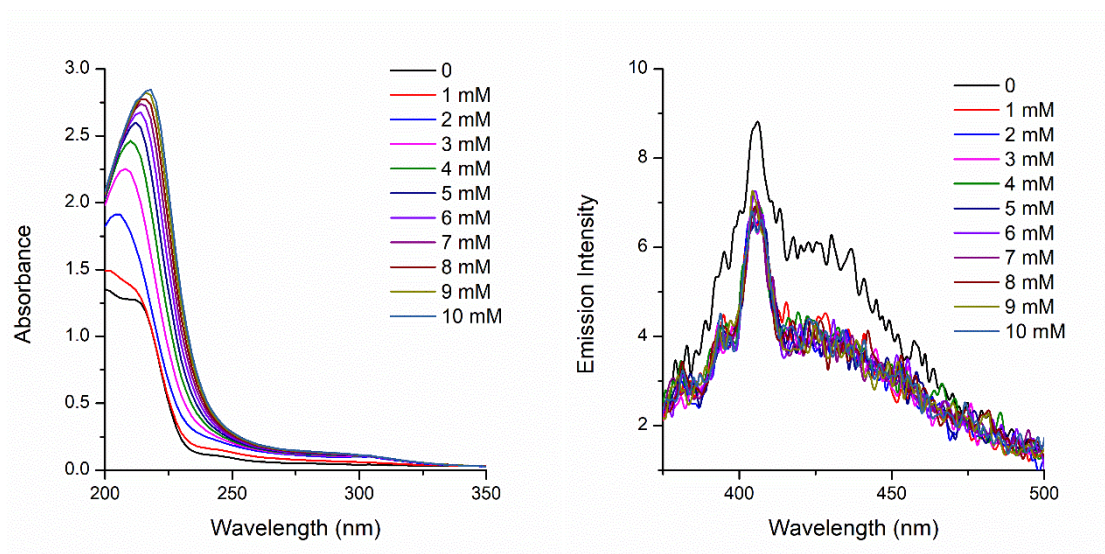

**Figure S24.** UV-Vis absorption (left) and fluorescence emission (right) spectra of **5a** at different amounts of  $\text{Co}^{2+}$  in a  $\text{CH}_3\text{CN}/\text{H}_2\text{O}$  solution.

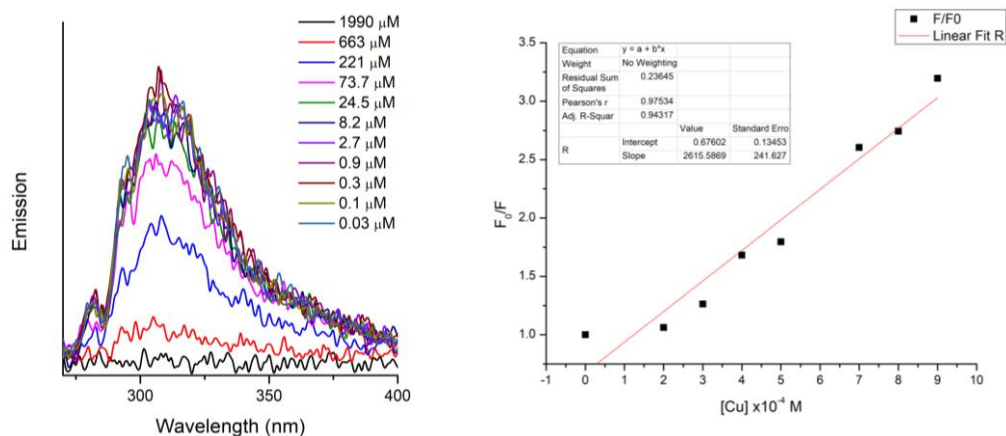

**Figure S25.** (left) Fluorescence emission spectrum of **5a** at different concentrations of  $\text{Cu}^{2+}$  in  $\text{CH}_3\text{CN}$  solution and (right) respective Stern-Volmer plot.

**Table S3.** Binding models for investigation of the interaction between ionic liquid and copper ion from the fluorescence titration data using supramolecular.org.

| Metal                                                                                                                                                                         | Binding model<br>(Host- guest) | K (M <sup>-1</sup> )     | Error<br>Percentage |
|-------------------------------------------------------------------------------------------------------------------------------------------------------------------------------|--------------------------------|--------------------------|---------------------|
| Cu <sup>2+</sup>                                                                                                                                                              | 1:1                            | 3565.08                  | ± 3.1247            |
|                                                                                                                                                                               | 2:1                            | 4978.55                  | ± 1.2620            |
|                                                                                                                                                                               |                                | -4957.18 M <sup>-1</sup> | ± -0.2708           |
| Results for Nelder-Mead (1:1 model):                                                                                                                                          |                                |                          |                     |
| <a href="http://app.supramolecular.org/bindfit/view/02c6fe28-e965-417f-af22-c1541f3ccba7">http://app.supramolecular.org/bindfit/view/02c6fe28-e965-417f-af22-c1541f3ccba7</a> |                                |                          |                     |
| Results for none Nelder-Mead (full) (2:1 model):                                                                                                                              |                                |                          |                     |
| <a href="http://app.supramolecular.org/bindfit/view/ada49cc1-7bdb-4737-81ec-b875fec623e6">http://app.supramolecular.org/bindfit/view/ada49cc1-7bdb-4737-81ec-b875fec623e6</a> |                                |                          |                     |
